# Supplementary material for: Effect of Penthorum Chinense Pursh Compound on AFB1-Induced Immune Imbalance via JAK/STAT Signaling Pathway in Spleen of Broiler Chicken
Source: MDPI journal article supplement (doi:10.3390/vetsci10080521), 2023-08-13
Supplement: s1 [file s1]

Table S1 Composition of broiler diet in control group

| Ingredients                | Proportion (%) |
|----------------------------|----------------|
| Corn                       | 55.3           |
| Soybean                    | 38.0           |
| Calcium hydrogen phosphate | 1.4            |
| Rock flour                 | 1.0            |
| Salt                       | 0.3            |
| Oil                        | 3.0            |
| Additives                  | 1.0            |
